# Supplementary material for: High Frequency Hysteresis Losses on γ-Fe2O3 and Fe3O4: Susceptibility as a Magnetic Stamp for Chain Formation
Source: PubMed Central journal article supplement (PMC6315427; doi:10.3390/nano8120970), 2018-11-24
Supplement: nanomaterials-08-00970-s001.pdf [file nanomaterials-08-00970-s001.pdf]

Article

# High Frequency Hysteresis Losses on $\gamma$ -Fe<sub>2</sub>O<sub>3</sub> and Fe<sub>3</sub>O<sub>4</sub>: Susceptibility as a Magnetic Stamp for Chain Formation

Irene Morales <sup>1</sup>, Rocio Costo <sup>2</sup>, Nicolas Mille <sup>3</sup>, Gustavo B. da Silva <sup>2</sup>, Julian Carrey <sup>3</sup>, Antonio Hernando <sup>1,4</sup>, and Patricia de la Presa <sup>1,4,\*</sup>

<sup>1</sup> Instituto de Magnetismo Aplicado (UCM-ADIF-CSIC), P.O. Box 155, Las Rozas, 28230 Madrid, Spain; irenemorales@ucm.es (I.M.); antonio.hernando@externos.adif.es (A.H.)

<sup>2</sup> Instituto de Ciencia de Materiales de Madrid/CSIC, Sor Juana Inés de la Cruz 3, 28049 Madrid, Spain; rocio.cost@gmail.com (R.C.); gusbezerra@ufrj.br (G.B.d.S.)

<sup>3</sup> Université de Toulouse, INSA, UPS, Laboratoire de Physique et Chimie des Nano-Objets (LPCNO), 135 Avenue de Rangueil, F-31077 Toulouse, France and CNRS, UMR 5215, LPCNO, F-31077 Toulouse, France; mille@insa-toulouse.fr (N.M.); julian.carrey@insa-toulouse.fr (J.C.)

<sup>4</sup> Departamento de Física de Materiales, Universidad Complutense de Madrid, 28048 Madrid, Spain

\* Correspondence: pmpresa@ucm.es; Tel.: +34-91-300-71-73

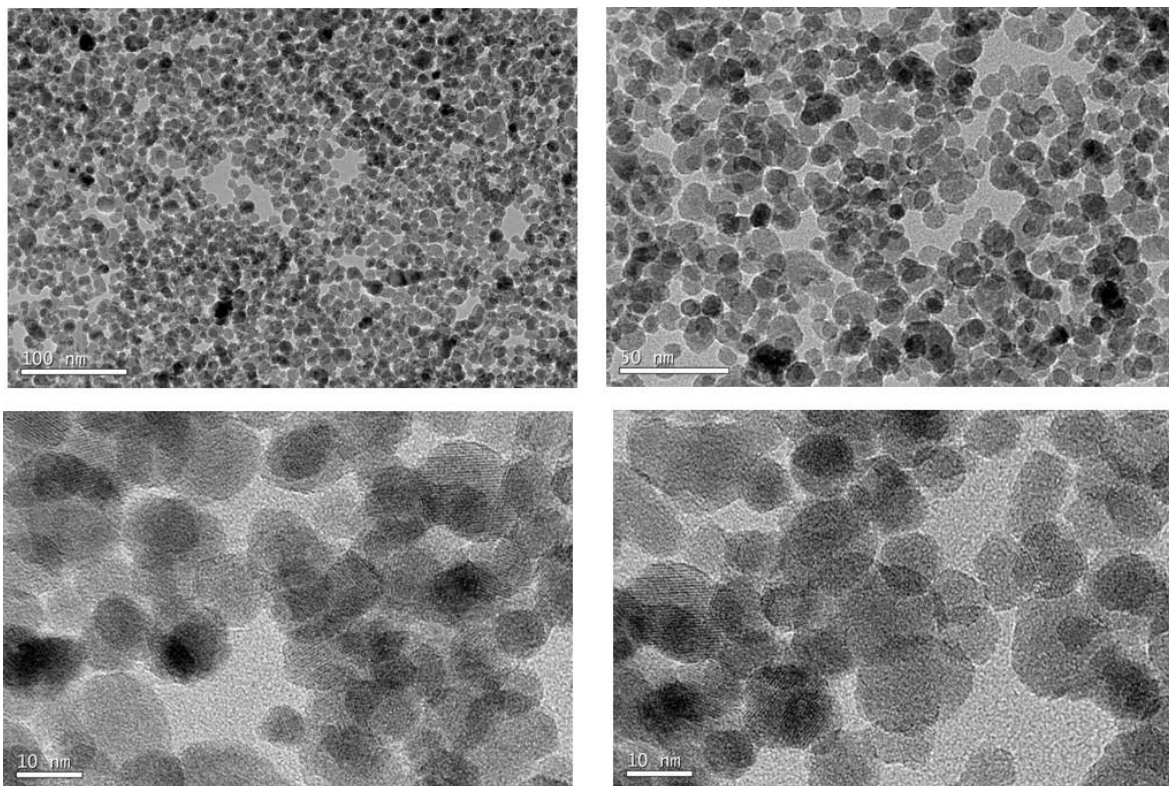

Figure S1. (a) TEM images  $\gamma$ -Fe<sub>2</sub>O<sub>3</sub>-12nm at different augmentations.

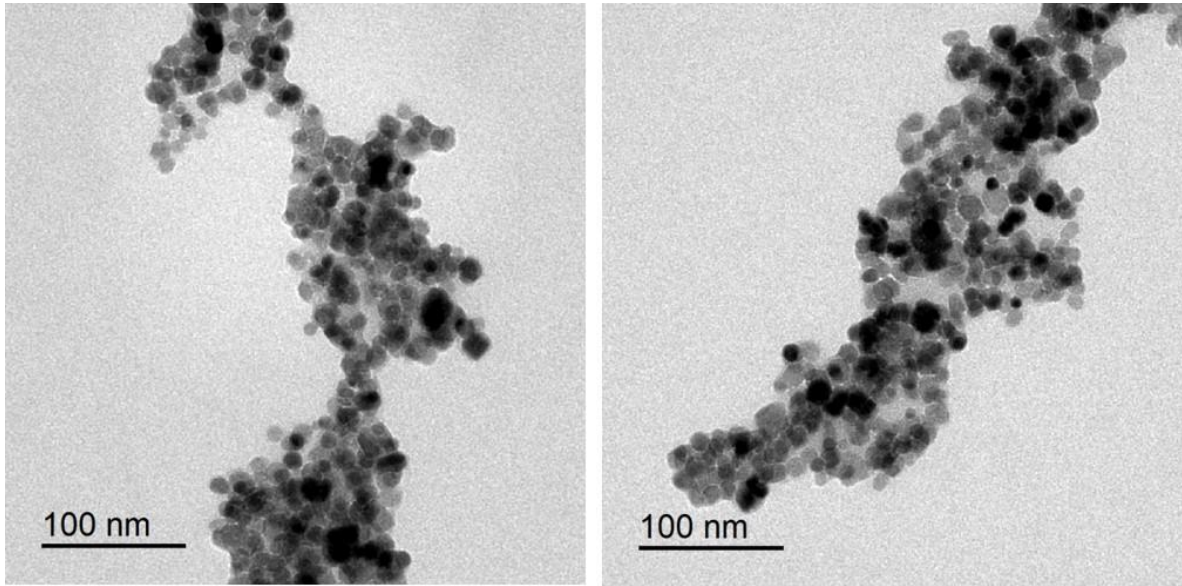

**Figure S1. (b)** TEM images  $\gamma$ -Fe<sub>2</sub>O<sub>3</sub>-14nm.

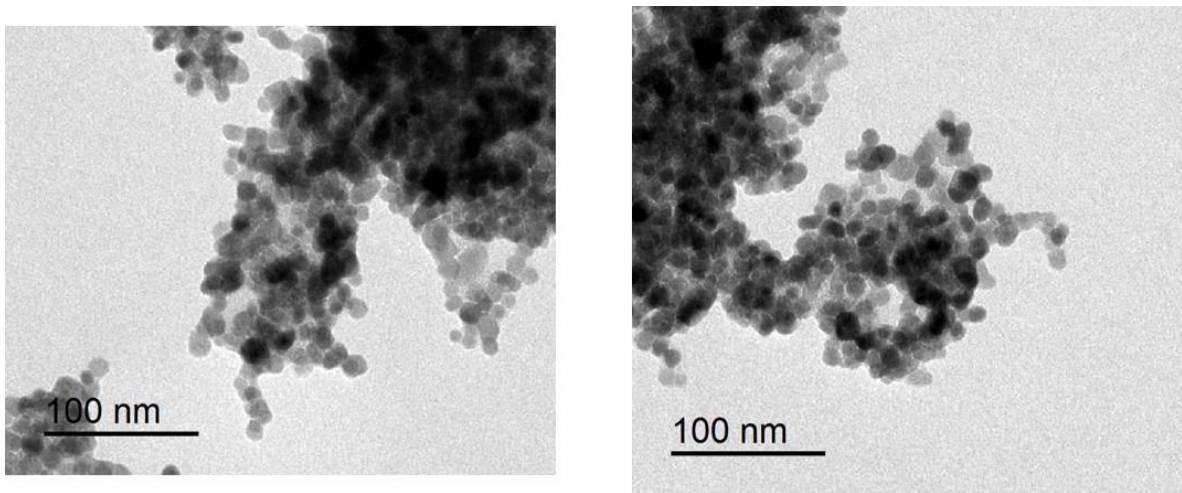

**Figure S1. (c)** TEM images Fe<sub>3</sub>O<sub>4</sub>-14nm.

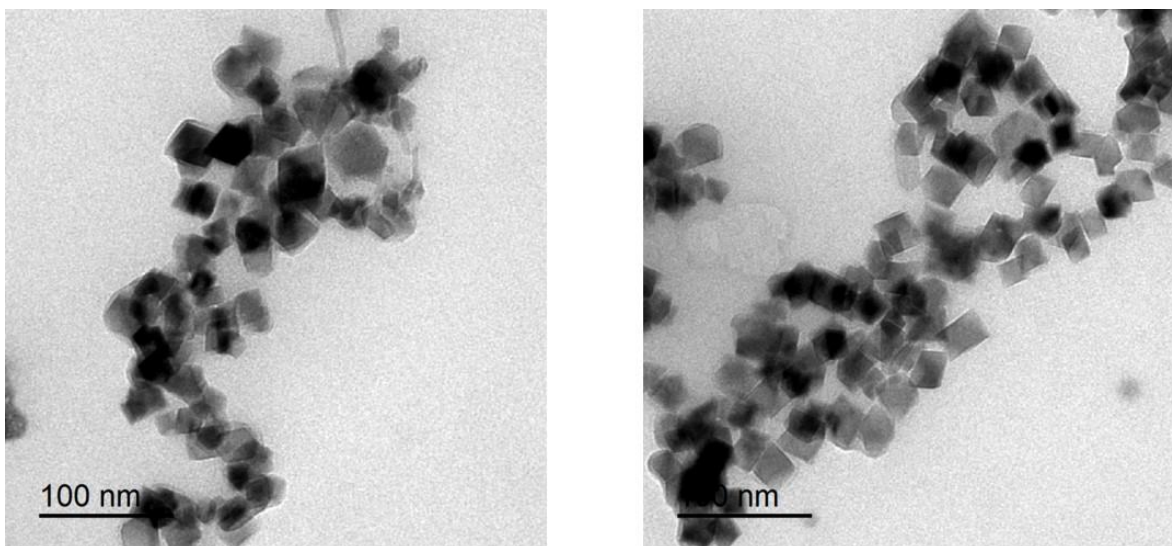

**Figure S1. (d)** TEM images Fe<sub>3</sub>O<sub>4</sub>-35nm.

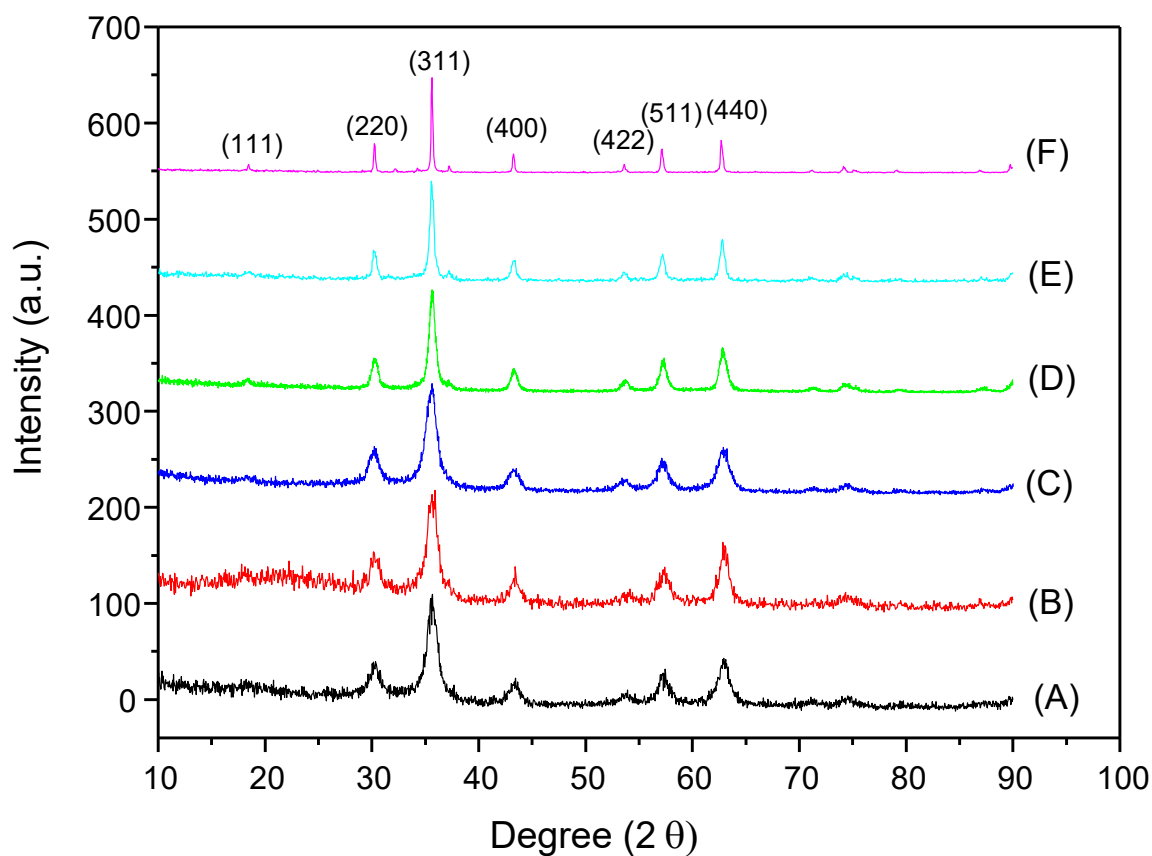

**Figure S2.** X-ray diffraction patterns for the maghemite and magnetite nanoparticles: (A)  $\gamma$ -Fe<sub>2</sub>O<sub>3</sub>-6nm, (B)  $\gamma$ -Fe<sub>2</sub>O<sub>3</sub>-8nm, (C)  $\gamma$ -Fe<sub>2</sub>O<sub>3</sub>-12nm, (D)  $\gamma$ -Fe<sub>2</sub>O<sub>3</sub>-14nm, (E) Fe<sub>3</sub>O<sub>4</sub>-35nm, and (F) Fe<sub>3</sub>O<sub>4</sub>-350nm.

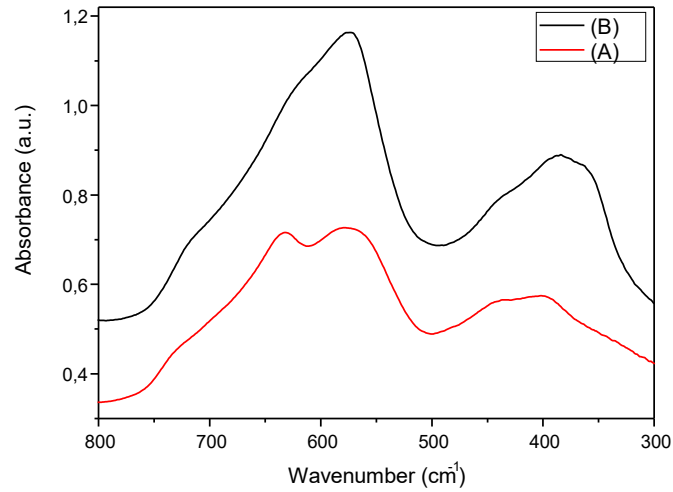

**Figure S3.** FTIR spectra of samples (A)  $\gamma\text{Fe}_2\text{O}_3$ -8nm, and (B)  $\text{Fe}_3\text{O}_4$ -14nm between 800 and 300  $\text{cm}^{-1}$  which correspond to Fe-O vibrations.

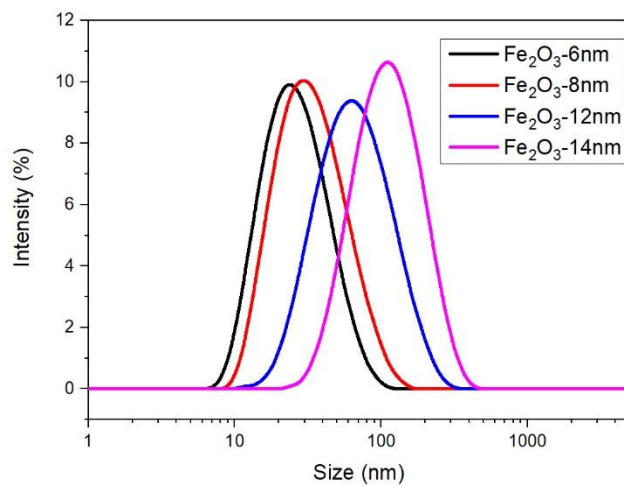

**Figure S4.** Hydrodynamic sizes  $D_h$  at pH7 for  $\gamma\text{-Fe}_2\text{O}_3$  nanoparticles.

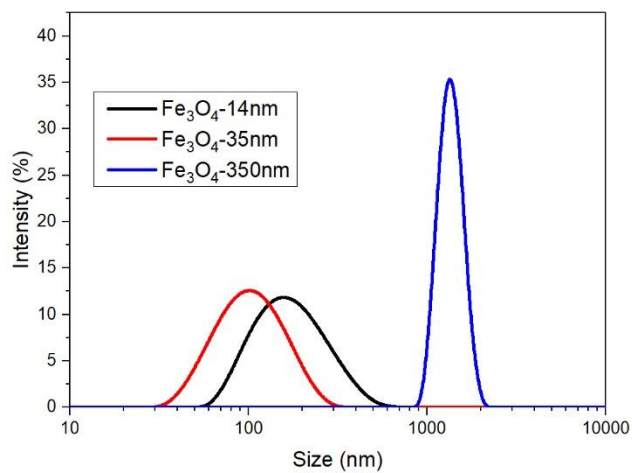

**Figure S5.** Hydrodynamic sizes  $D_h$  at pH7 for Fe<sub>3</sub>O<sub>4</sub> nanoparticles.

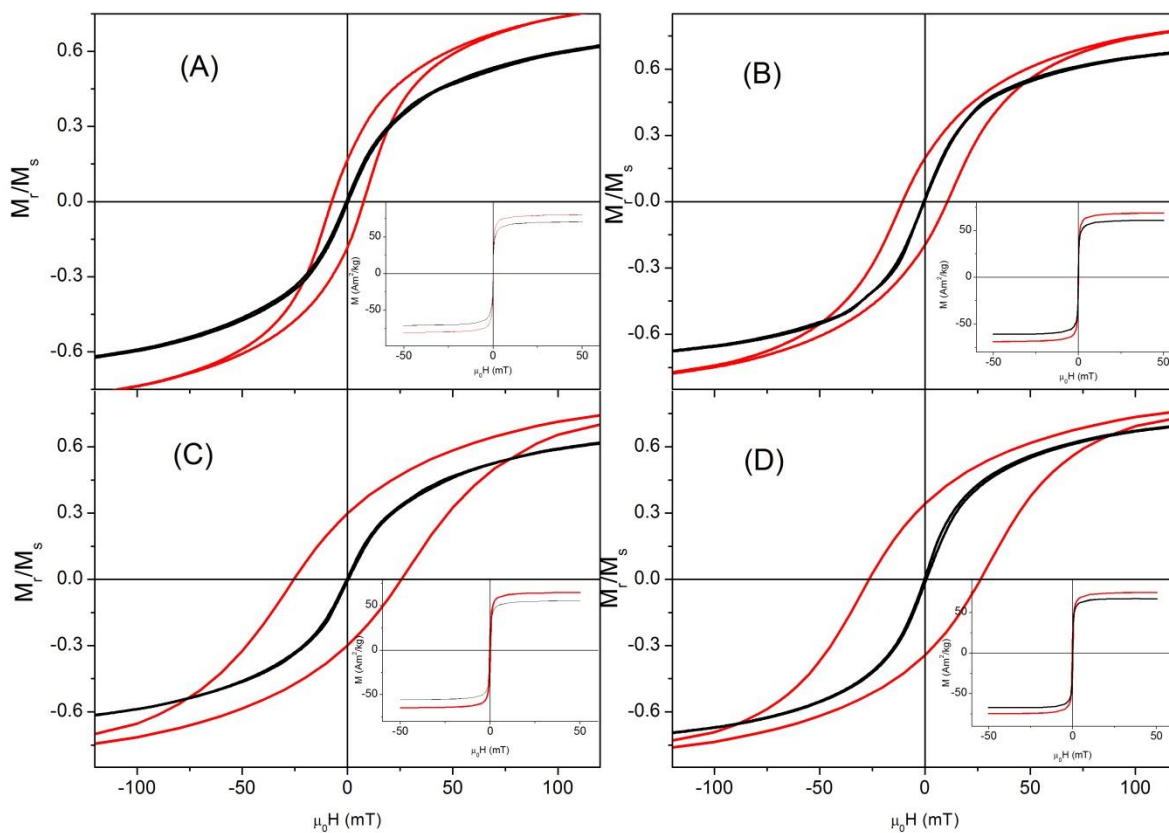

**Figure S6.** Hysteresis loops at 10 K (red) and 300 K (black) for samples (A)  $\gamma\text{Fe}_2\text{O}_3$ -6nm, (B)  $\gamma\text{Fe}_2\text{O}_3$ -8nm, (C)  $\gamma\text{Fe}_2\text{O}_3$ -12nm, and (D)  $\gamma\text{Fe}_2\text{O}_3$ -12nm.

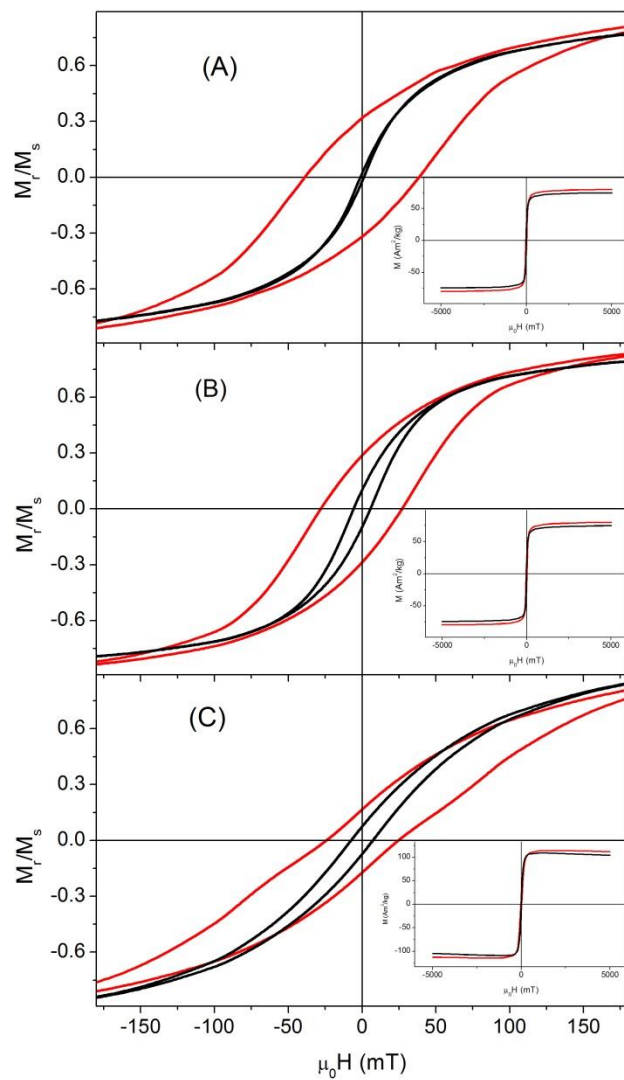

**Figure S7.** Hysteresis loops at 10 K (red) and 300 K (black) for samples (A)  $\text{Fe}_3\text{O}_4$ -14nm, (B)  $\text{Fe}_3\text{O}_4$ -35nm, and (C)  $\text{Fe}_3\text{O}_4$ -350nm.
